# Supplementary material for: Loading history changes the morphology and compressive force-induced expression of receptor activator of nuclear factor kappa B ligand/osteoprotegerin in MLO-Y4 osteocytes
Source: PubMed Central journal article supplement (PMC7659647; doi:10.7717/peerj.10244), 2020-11-09
Supplement: peerj-08-10244-s002.pdf [file peerj-08-10244-s002.pdf]

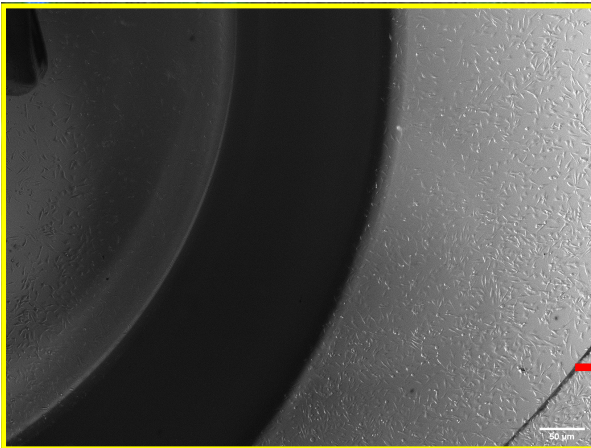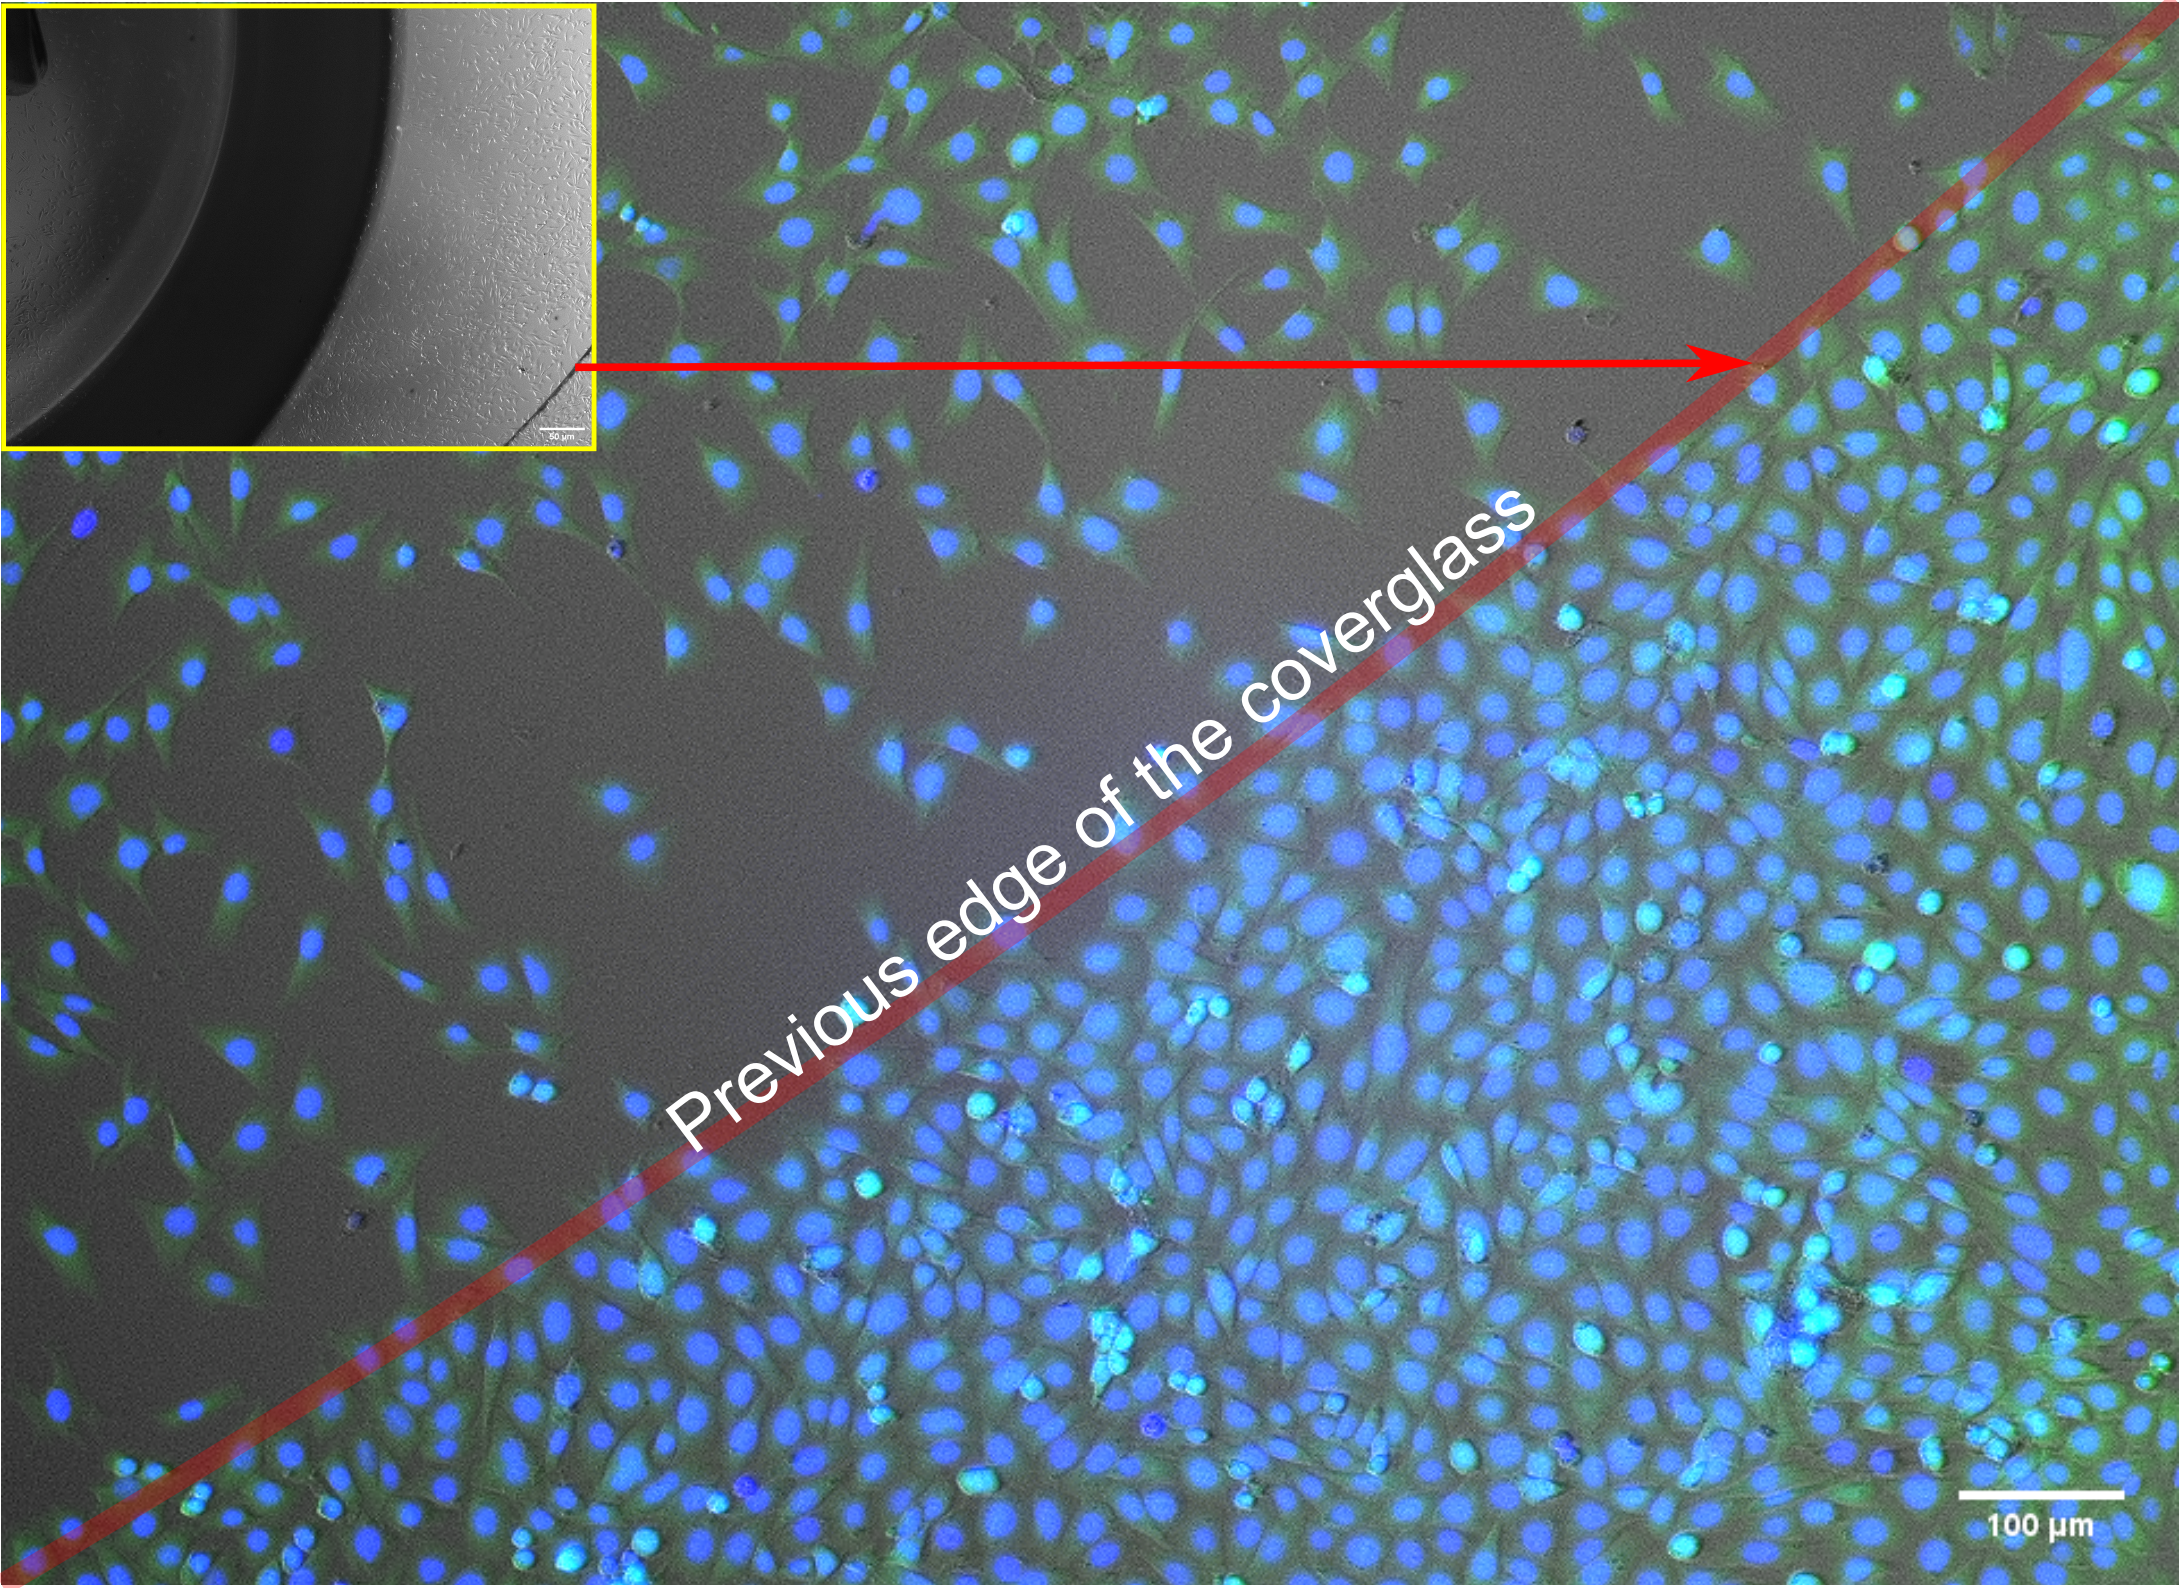

Previous edge of the coverglass

100 μm
